# Supplementary material
Source: PubMed Central journal article supplement (PMC6220216)
Supplement: ajtr0010-3276-f6.pdf [file ajtr0010-3276-f6.pdf]

GTPs protect against renal injury through jagged1/notch1 signaling

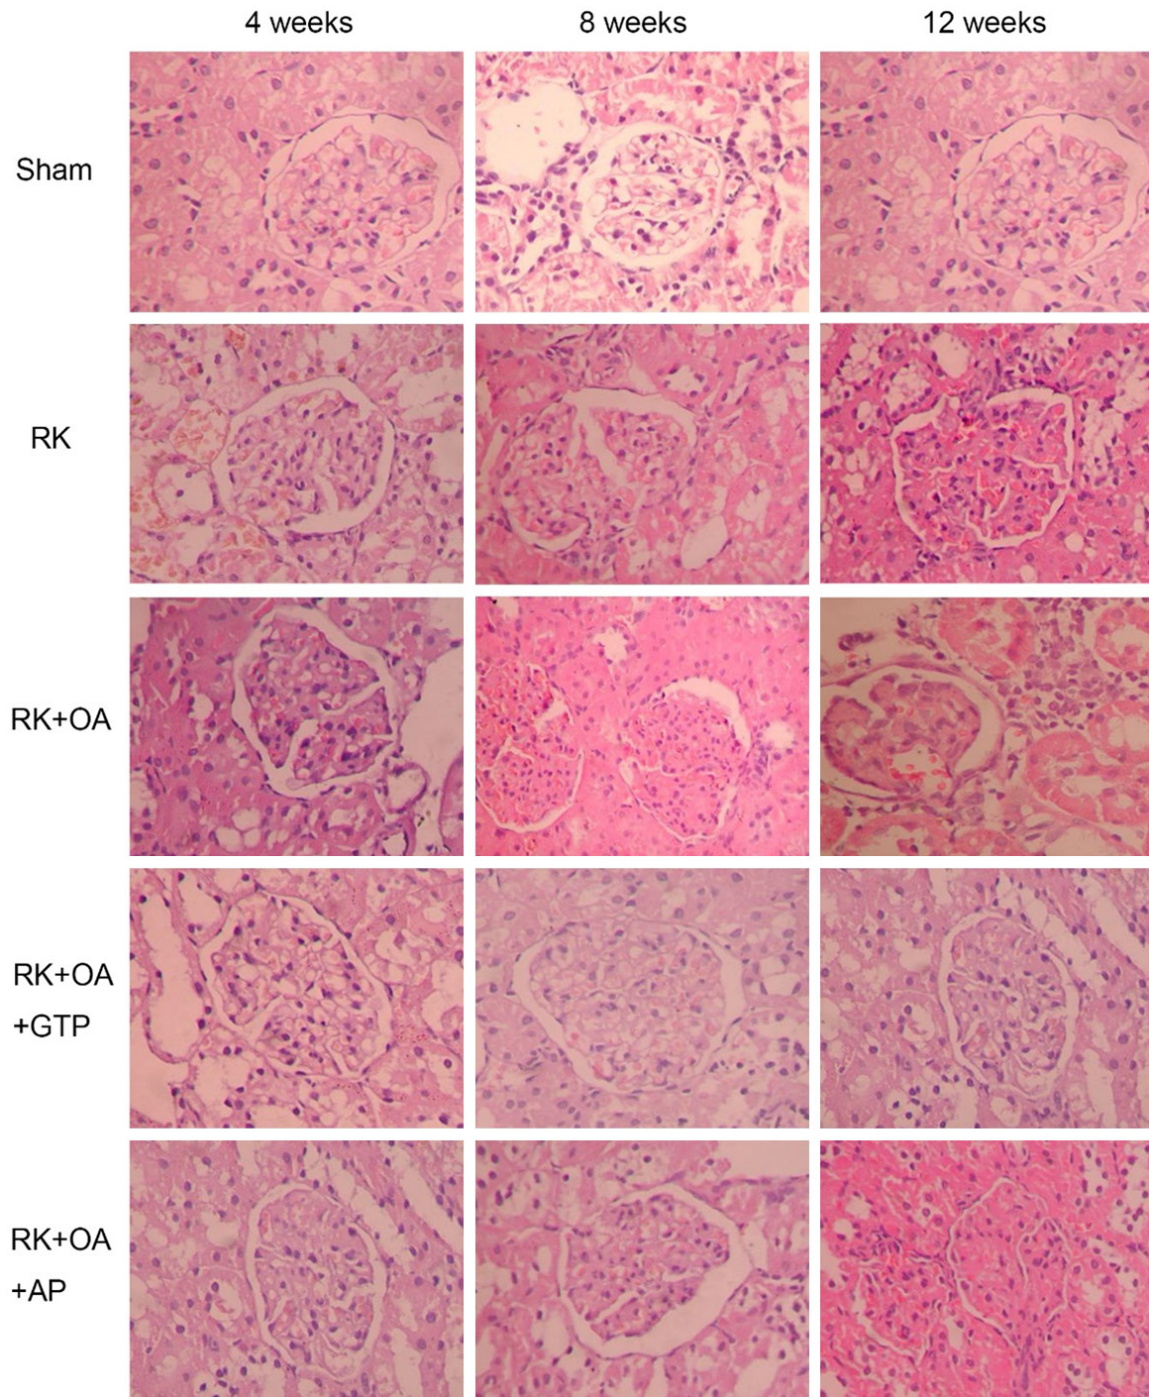

**Figure S1.** Morphology of the glomeruli in the different groups. Histologic examinations were performed after H&E staining.

GTPs protect against renal injury through jagged1/notch1 signaling

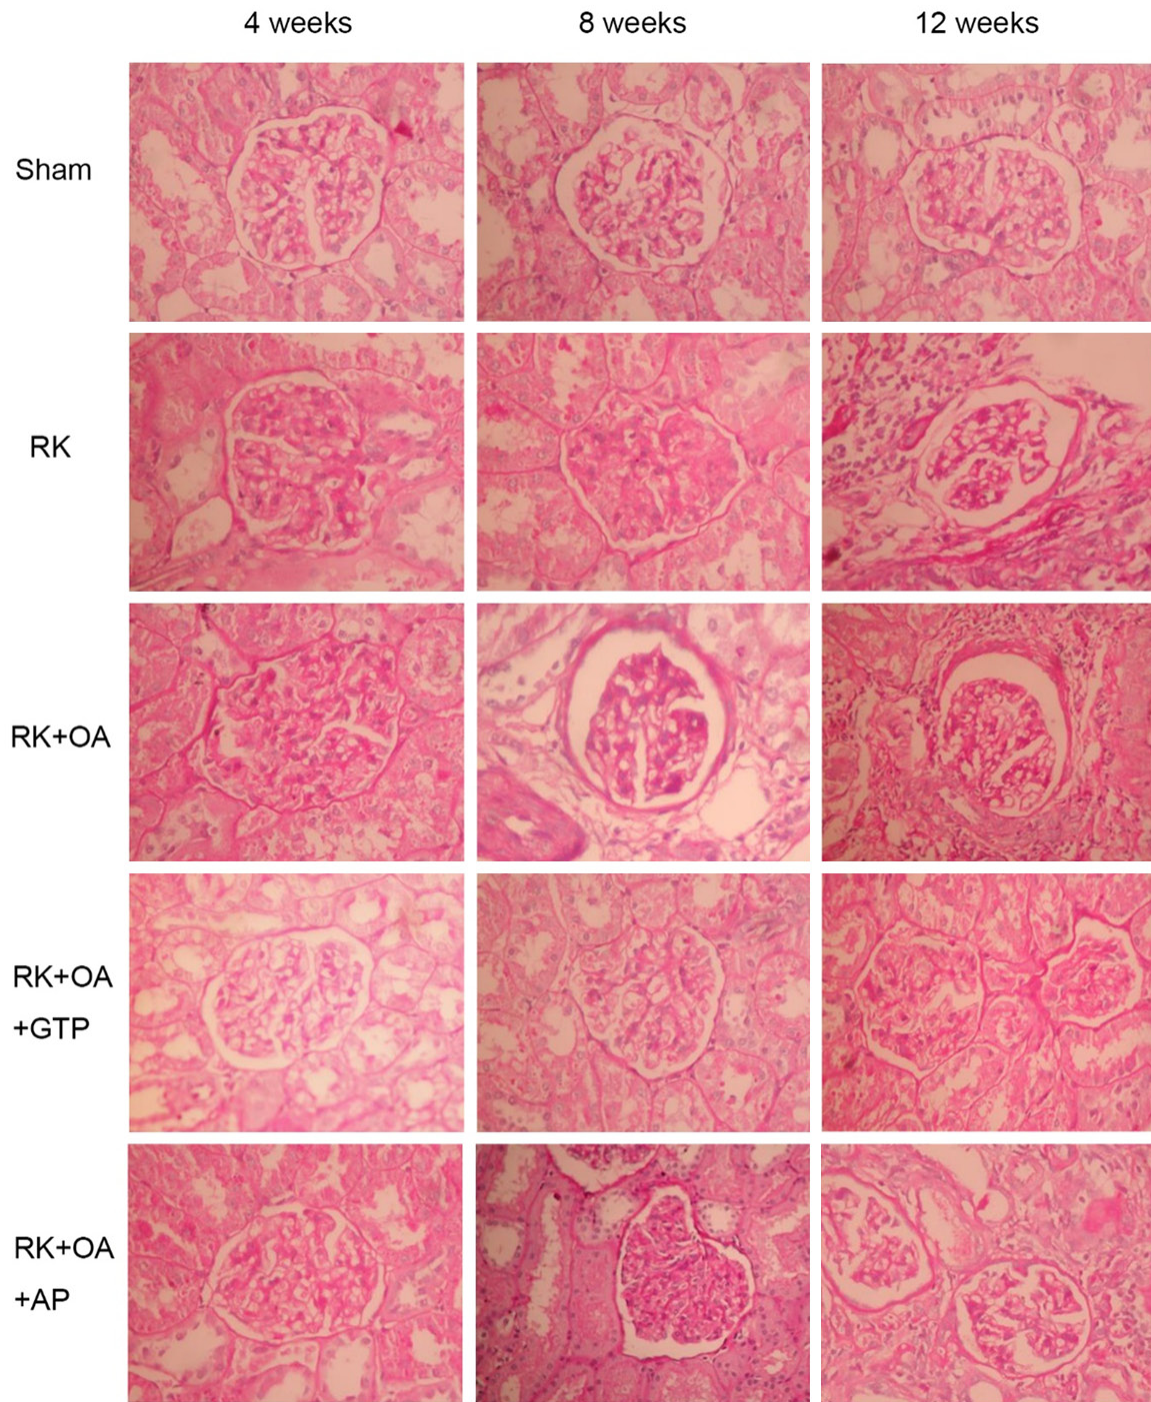

**Figure S2.** Morphology of glomeruli in the different groups. Histologic examinations were performed after PAS staining.

GTPs protect against renal injury through jagged1/notch1 signaling

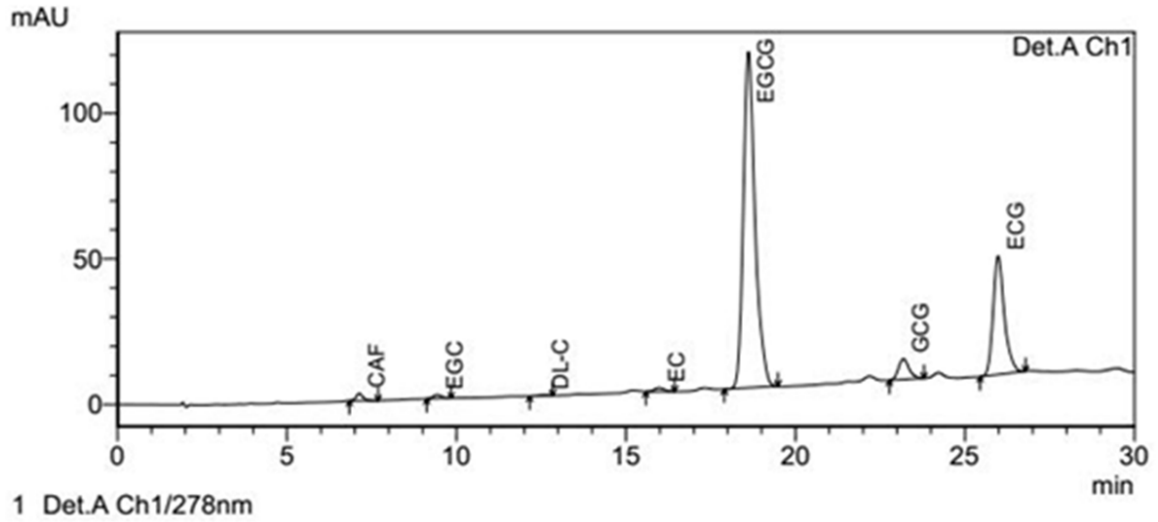

1 Det.A Ch1/278nm

PeakTable

Detector A Ch1 278nm

| Peak# | Name | Ret. Time | Area    | Height | Area %  | Conc.  |
|-------|------|-----------|---------|--------|---------|--------|
| 1     | CAF  | 7.126     | 34081   | 2498   | 0.867   | 0.377  |
| 2     | EGC  | 9.425     | 23014   | 1268   | 0.585   | 2.975  |
| 3     | DL-C | 12.550    | 4899    | 247    | 0.125   | 0.324  |
| 4     | EC   | 15.975    | 25550   | 1264   | 0.650   | 0.908  |
| 5     | EGCG | 18.616    | 2748284 | 115425 | 69.904  | 53.373 |
| 6     | GCG  | 23.184    | 155077  | 7120   | 3.944   | 4.546  |
| 7     | ECG  | 25.981    | 940629  | 40743  | 23.925  | 14.213 |
| Total |      |           | 3931535 |        | 100.000 |        |

Figure S3. Chromatographic analysis of GTP purity.
